## Prognostic significance of serum beta-2 microglobulin in patients with diffuse large B-cell lymphoma in the rituximab era

Seyoung Seo<sup>1,\*</sup>, Jung Yong Hong<sup>1,\*</sup>, Shinkyoo Yoon<sup>1,7</sup>, Changhoon Yoo<sup>1</sup>, Ji Hyun Park<sup>1</sup>, Jung Bok Lee<sup>2</sup>, Chan-sik Park<sup>3</sup>, Jooryung Huh<sup>4</sup>, Yoonse Lee<sup>4</sup>, Kyung Won Kim<sup>5</sup>, Jin-Sook Ryu<sup>6</sup>, Seok Jin Kim<sup>8</sup>, Won Seog Kim<sup>8</sup>, Dok Hyun Yoon<sup>1</sup>, Cheolwon Suh<sup>1</sup>

<sup>1</sup>Department of Oncology, Asan Medical Center, University of Ulsan College of Medicine, Seoul, Korea

<sup>2</sup>Department of Medical Statistics, Asan Medical Center, University of Ulsan College of Medicine, Seoul, Korea

<sup>3</sup>Department of Pathology, Asan Medical Center, University of Ulsan College of Medicine, Seoul, Korea

<sup>4</sup>Department of Otorhinolaryngology, Asan Medical Center, University of Ulsan College of Medicine, Seoul, Korea

<sup>5</sup>Department of Radiology, Asan Medical Center, University of Ulsan College of Medicine, Seoul, Korea

<sup>6</sup>Department of Nuclear Medicine, Asan Medical Center, University of Ulsan College of Medicine, Seoul, Korea

<sup>7</sup>Department of Hemato-oncology, Bundang Jesaeng Hospital, Gyeonggi-do, Korea

<sup>8</sup>Division of Hematology-Oncology, Department of Medicine, Samsung Medical Center, Sungkyunkwan University School of Medicine, Seoul, Korea

\*These authors contributed equally to this work

**Correspondence to:** Cheolwon Suh, **email:** csuh@amc.seoul.kr  
Dok Hyun Yoon, **email:** dhyoon@amc.seoul.kr

**Keywords:** beta 2-microglobulin, diffuse large B-cell lymphoma, rituximab, prognosis, non-Hodgkin lymphoma

**Received:** July 22, 2016

**Accepted:** October 12, 2016

**Published:** October 18, 2016

### ABSTRACT

The prognostic value of serum beta-2 microglobulin for diffuse large B-cell lymphoma (DLBCL) is not well known in the rituximab era. A retrospective registry data analysis of 833 patients with *de novo* DLBCL treated with rituximab, cyclophosphamide, doxorubicin, vincristine, and prednisone (R-CHOP) was conducted to establish the prognostic significance of serum beta-2 microglobulin at a  $\geq 2.5$  mg/L cutoff. Five-year progression-free survival (PFS, 76.1% vs. 41.0%;  $p < 0.001$ ) and overall survival (OS, 83.8% vs. 49.2%;  $p < 0.001$ ) were significantly worse in patients with elevated serum beta-2 microglobulin ( $n = 290$ , 34.8%). Furthermore, the five parameters of the International Prognostic Index, accompanying B symptoms, bone marrow involvement and impaired renal function were associated with worse PFS and OS. In multivariate analysis, elevated beta-2 microglobulin was a significant poor prognostic factor for PFS (hazard ratio [HR], 1.70; 95% confidence interval [CI], 1.29–2.24;  $p < 0.001$ ) and OS (HR, 2.0; 95% CI, 1.47–2.75;  $p < 0.001$ ). In an independent validation cohort of 258 R-CHOP treated patients with *de novo* DLBCL, elevated beta-2 microglobulin levels remained a significant poor prognostic factor for PFS (HR, 2.03; 95% CI, 1.23–3.32;  $p = 0.005$ ) and exhibited a strong trend of association with worse OS (HR, 1.64; 95% CI, 0.98–2.75;  $p = 0.062$ ). The significance of serum beta-2 microglobulin levels as an independent prognostic factor for patients with DLBCL receiving R-CHOP is confirmed.

### INTRODUCTION

Diffuse large B-cell lymphoma (DLBCL) is the most common subtype of non-Hodgkin lymphoma,

a heterogeneous disease with a variety of molecular aberrations and diverse clinical outcomes [1, 2]. In recent years, significant advances in the treatment of DLBCL have been achieved with the addition of the anti-CD20

monoclonal antibody, rituximab to the existing protocol consisting of cyclophosphamide, doxorubicin, vincristine, and prednisone (CHOP) [3, 4].

The International Prognostic Index (IPI) utilized for over the past 20 years to determine the prognosis of patients with DLBCL, remains a valid predictor of clinical outcomes even in the rituximab-CHOP (R-CHOP) era [5, 6]. However, the standard IPI has suboptimal predictive power in high-risk patients with DLBCL and new prognostic tools such as the revised-IPI (R-IPI) and National Comprehensive Cancer Network (NCCN)-IPI showed to improve risk stratification of patients [7, 8]. However, there is still an unmet need for the identification of newer and better prognostic parameters.

Beta-2 microglobulin is synthesized in all nucleated cells and forms the light chain subunit of the major histocompatibility complex class I antigen [9, 10]. Free soluble beta-2 microglobulin can be detected in blood, urine, and cerebrospinal fluid, following its release from the cell surface or cytoplasm [11]. Specifically, measurement of serum beta-2 microglobulin is essential for baseline work up of multiple myeloma and follicular lymphoma patients [12–14]. Previous studies showed elevated serum beta-2 microglobulin was an independent poor prognostic factor in patients with DLBCL treated with CHOP or CHOP-like regimens [15, 16]. However, the prognostic value of beta-2 microglobulin in patients with DLBCL treated with rituximab containing regimens has not yet been fully investigated.

The present study has investigated the prognostic value of baseline serum beta-2 microglobulin in patients with DLBCL treated with R-CHOP immunochemotherapy and externally validated its prognostic impact in an independent validation cohort.

## RESULTS

### Correlations between beta-2 microglobulin and clinical features

A total of 833 patients with DLBCL who met the inclusion criteria were included in the analysis. Baseline characteristics of patients are summarized in Table 1. Median age was 58 (range, 16–69) years and male to female ratio was 1.3:1.0. Median serum beta-2 microglobulin level was 2.1 (range, 0.7–29.6) mg/L. Serum beta-2 microglobulin level of 2.5 mg/L was used to classify patients into two groups. Accordingly, there were 290 (34.8%) patients in high beta-2 microglobulin group.

As shown in Table 1, the high beta-2 microglobulin group exhibited distinct adverse clinical features, such as older age (> 60), male sex, poor performance status (Eastern Cooperative Oncology Group [ECOG] performance score [PS] 2–4), elevated lactate dehydrogenase (LDH), impaired renal function estimated glomerular filtration rate [GFR] (< 60 mL/min/1.73 m<sup>2</sup>),

advanced stage disease (stage III–IV), multiple extranodal involvement ( $\geq 2$ ), presence of B-symptoms, non-germinal center B-cell-like (non-GCB) subtype, bone marrow involvement, bulky disease (> 10 cm), and higher IPI, R-IPI, and NCCN-IPI risk groups (Table 1).

### Prognostic significance of beta-2 microglobulin for survival

With a median follow-up duration of 47.6 months (range, 12.0–133.5), median progression-free survival (PFS) and overall survival (OS) time points were not reached. The 5-year PFS and OS rates were 63.8% and 71.6%, respectively (Figure 1A and 1B). Patients with high serum beta-2 microglobulin had substantially worse 5-year PFS and OS than those with low beta-2 microglobulin (PFS, 41.0% vs. 76.1%; hazard ratio [HR], 3.59; 95% confidence interval [CI], 2.82–4.56;  $p < 0.001$ ; OS, 49.2% vs. 83.8%; HR, 4.16; 95% CI, 3.16–5.48;  $p < 0.001$ , retrospectively) (Figure 1C and 1D).

Further subgroup analysis was performed after according to the IPI and NCCN-IPI risk groups (low/low-intermediate [L/LI] vs. high-intermediate/high [HI/H]). Patients with high beta-2 microglobulin had significantly worse PFS and OS than those with low beta-2 microglobulin among both L/LI and HI/H subgroups. Specifically, subgroup analysis according to the IPI risk groups revealed that the 5-year OS rates of the low and high beta-2 microglobulin were 88.7% and 64.2% in the L/LI risk subgroups ( $p < 0.001$ ) and 66.2% and 41.4% in the HI/H risk subgroups ( $p = 0.001$ ), respectively (Figure 2A and 2B). Additional subgroup analysis based on NCCN-IPI risk groups determined that the 5-year OS rates of the low and high beta-2 microglobulin groups were 88.3% and 68.1% in the L/LI risk subgroups ( $p < 0.001$ ) and 65.7% and 38.9% in the HI/H risk subgroups ( $p < 0.001$ ), respectively (Figure 2C and 2D). When subgroup analysis based on accompanying renal impairment (estimated GFR < 60 mL/min/1.73 m<sup>2</sup>) was conducted, high serum beta-2 microglobulin retained its potent poor prognostic impact on 5-year PFS (42% vs. 75%;  $p < 0.001$ ) and 5-year OS (50% vs. 84%;  $p < 0.001$ ) in patients with normal renal function group. Among patients with impaired renal function, there was only a trend of worsening PFS and OS in patients with elevated serum beta-2 microglobulin without statistical significance (5-year PFS, 38.2% vs. 80.0%;  $p = 0.342$  and 5-year OS, 44.0% vs. 100.0%;  $p < 0.055$ ).

### Analysis of prognostic factors

Clinical factors associated with worse PFS and OS in the univariate analysis were as follows: older age (> 60 years), poor performance status (ECOG PS 2–4), elevated serum LDH, impaired renal function (estimated GFR < 60 mL/min/1.73 m<sup>2</sup>), advanced stage (stage

**Table 1: Baseline characteristics of patients**

| Characteristics                             | N (%)      | Serum B2M, n (%)          |                           | P value |
|---------------------------------------------|------------|---------------------------|---------------------------|---------|
|                                             |            | < 2.5 mg/L<br>n = 543 (%) | ≥ 2.5 mg/L<br>n = 290 (%) |         |
| Age, Years                                  |            |                           |                           | < 0.001 |
| ≤ 60                                        | 488 (58.6) | 369 (68.0)                | 119 (41.0)                |         |
| > 60                                        | 345 (41.4) | 174 (32.0)                | 171 (59.0)                |         |
| Sex                                         |            |                           |                           | 0.015   |
| Male                                        | 475 (57.0) | 293 (54.0)                | 182 (62.8)                |         |
| Female                                      | 358 (43.0) | 250 (46.0)                | 108 (37.2)                |         |
| ECOG PS                                     |            |                           |                           | < 0.001 |
| 0–1                                         | 762 (91.5) | 526 (96.9)                | 236 (81.4)                |         |
| 2–4                                         | 91 (8.5)   | 17 (3.1)                  | 54 (18.6)                 |         |
| Serum LDH                                   |            |                           |                           | < 0.001 |
| Normal                                      | 440 (52.8) | 371 (68.3)                | 69 (23.8)                 |         |
| Elevated                                    | 393 (47.2) | 172 (31.7)                | 221 (76.2)                |         |
| Estimated GFR (mL/min/1.73 m <sup>2</sup> ) |            |                           |                           | < 0.001 |
| ≥ 60                                        | 774 (92.9) | 538 (99.1)                | 236 (81.4)                |         |
| < 60                                        | 59 (7.1)   | 5 (0.9)                   | 54 (18.6)                 |         |
| Ann Arbor stage                             |            |                           |                           | < 0.001 |
| I–II                                        | 398 (47.8) | 337 (62.1)                | 61 (21.0)                 |         |
| III–IV                                      | 435 (52.2) | 206 (37.9)                | 229 (79.0)                |         |
| Number of extranodal sites                  |            |                           |                           | < 0.001 |
| 0–1                                         | 534 (64.1) | 412 (75.9)                | 122 (42.1)                |         |
| ≥ 2                                         | 299 (35.9) | 131 (24.1)                | 168 (57.9)                |         |
| Bone marrow                                 |            |                           |                           | < 0.001 |
| No involvement                              | 708 (85)   | 502 (92.4)                | 206 (71.0)                |         |
| Involvement                                 | 125 (15)   | 41 (7.6)                  | 84 (29.0)                 |         |
| B symptoms                                  |            |                           |                           | < 0.001 |
| No                                          | 648 (77.8) | 477 (87.8)                | 171 (59.0)                |         |
| Yes                                         | 185 (22.2) | 66 (12.2)                 | 119 (41.0)                |         |
| Hans classification <sup>a</sup> (n = 693)  |            |                           |                           | 0.008   |
| GCB                                         | 229 (33.0) | 165 (36.5)                | 64 (26.6)                 |         |
| Non-GCB                                     | 464 (67.0) | 287 (63.5)                | 177 (73.4)                |         |
| Bulky disease                               |            |                           |                           | < 0.001 |
| No                                          | 772 (92.7) | 516 (95.0)                | 256 (88.3)                |         |
| Yes (> 10 cm)                               | 61 (7.3)   | 27 (5.0)                  | 34 (11.7)                 |         |
| IPI                                         |            |                           |                           | < 0.001 |
| Low (0–1)                                   | 398 (47.8) | 343 (63.2)                | 55 (19.0)                 |         |
| Low-intermediate (2)                        | 142 (17.0) | 98 (18.0)                 | 44 (15.2)                 |         |
| High-intermediate (3)                       | 149 (17.9) | 62 (11.4)                 | 87 (30.0)                 |         |
| High (4–5)                                  | 144 (17.3) | 40 (7.6)                  | 104 (35.9)                |         |
| Revised IPI                                 |            |                           |                           | < 0.001 |
| Very good (0)                               | 203 (24.4) | 196 (36.1)                | 7 (2.4)                   |         |
| Good (1–2)                                  | 337 (40.5) | 245 (45.1)                | 92 (31.7)                 |         |
| Poor (3–5)                                  | 293 (35.2) | 102 (18.8)                | 191 (65.9)                |         |
| NCCN-IPI                                    |            |                           |                           | < 0.001 |
| Low (0–1)                                   | 138 (16.6) | 132 (24.3)                | 6 (2.1)                   |         |
| Low-intermediate (2–3)                      | 394 (47.3) | 300 (55.2)                | 94 (32.4)                 |         |
| High-intermediate (4–5)                     | 242 (29.1) | 97 (17.9)                 | 145 (50.0)                |         |
| High (≥6)                                   | 59 (7.1)   | 14 (2.6)                  | 45 (15.5)                 |         |

Abbreviations: B2M, beta-2 microglobulin; ECOG, Eastern Cooperative Oncology Group; GCB, germinal center-like B cell-like; GFR, glomerular filtration rate; IPI, international prognostic index; LDH, lactate dehydrogenase; NCCN, National Comprehensive Cancer Network; PS, performance score; UNL, upper normal limit;

<sup>a</sup>Data for the Hans algorithm were available in 693 patients.

III–IV), multiple extranodal involvement (≥ 2), presence of B-symptoms, bone marrow involvement, and non-GCB subtype (Table 2). Multivariate analysis showed that high beta-2 microglobulin group was associated significantly with worse PFS (HR, 1.70; 95% CI, 1.29–2.24;  $p < 0.001$ )

and OS (HR, 2.00; 95% CI, 1.47–2.75;  $p < 0.001$ ) (Table 3). Other independent prognostic factors for worse PFS and OS were older age (> 60 years), poor performance status (ECOG PS 2–4), elevated serum LDH, advanced stage (stage III–IV) (Table 3).

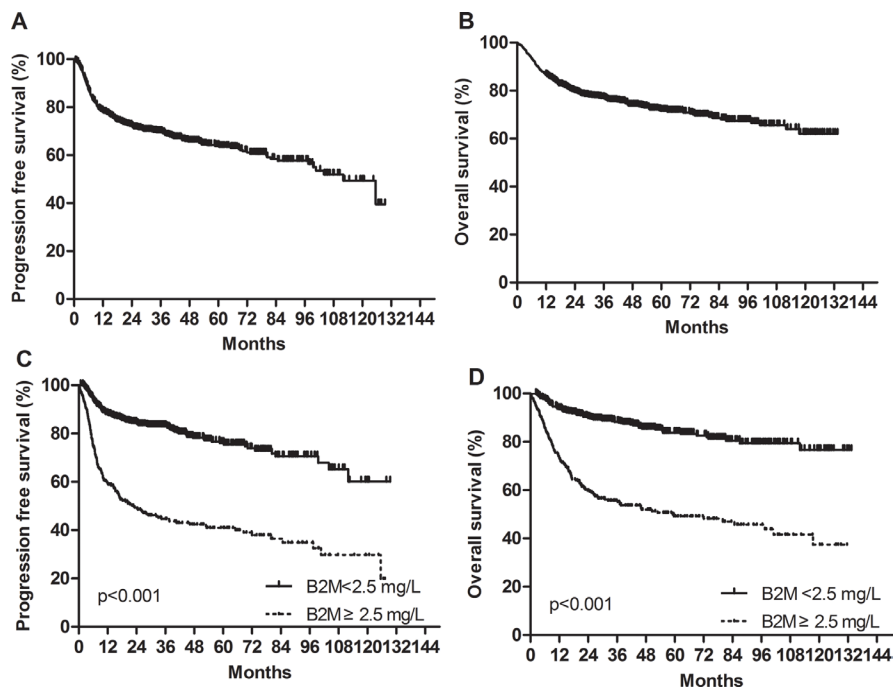

**Figure 1: Progression-free survival and overall survival in the training cohort. (A)** Progression-free survival. **(B)** Overall survival. **(C)** Progression-free survival according to baseline serum beta-2 microglobulin levels. **(D)** Overall survival according to baseline serum beta-2 microglobulin levels.

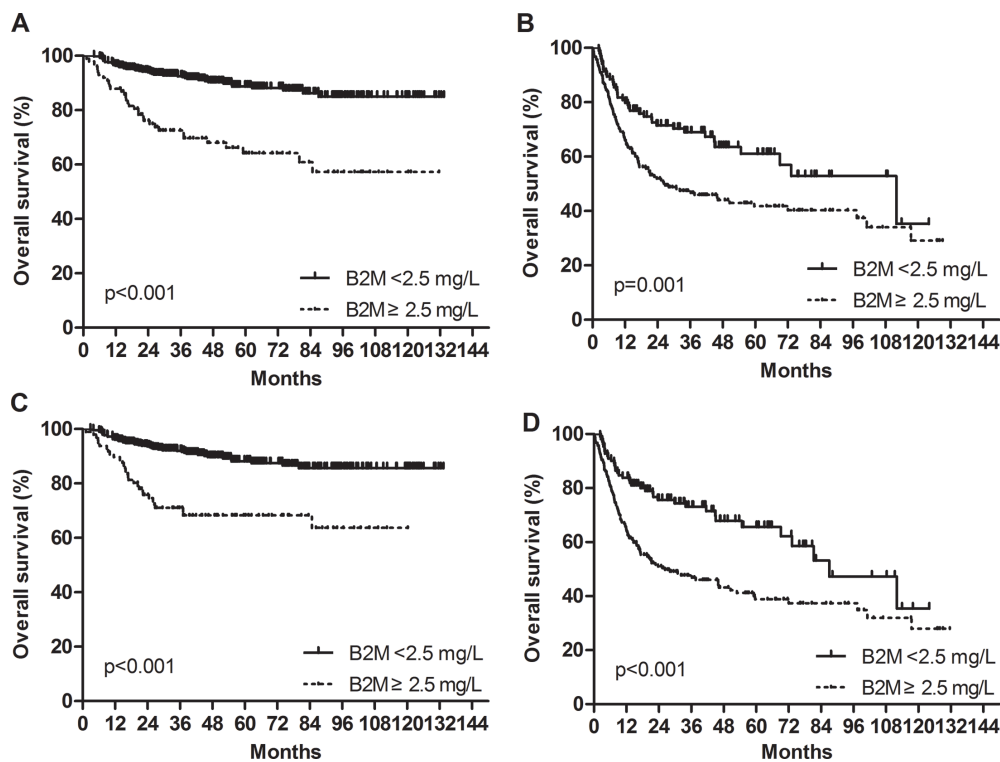

**Figure 2: Impact of beta-2 microglobulin on the prediction of overall survival in the low/low-intermediate and high-intermediate/high risk groups by the IPI and NCCN-IPI in the training cohort. (A)** Low/low-intermediate risk groups by the IPI. **(B)** High-intermediate/high risk groups by the IPI. **(C)** Low/low-intermediate risk groups by the NCCN-IPI. **(D)** High-intermediate/high risk groups by the NCCN-IPI.

**Table 2: Univariate analysis for the association between clinical factors and survival outcomes**

| Characteristics                                 | Progression free survival |         | Overall survival    |         |
|-------------------------------------------------|---------------------------|---------|---------------------|---------|
|                                                 | HR (95% CI)               | P value | HR (95% CI)         | P value |
| Serum B2M $\geq$ 2.5 mg/L                       | 3.59 (2.82–4.56)          | < 0.001 | 4.16 (3.16–5.48)    | < 0.001 |
| Age > 60 years                                  | 2.72 (2.13–3.46)          | < 0.001 | 3.01 (2.28–3.95)    | < 0.001 |
| Female                                          | 0.89 (0.70–1.13)          | 0.327   | 0.99 (0.76–1.30)    | 0.962   |
| ECOG PS, 2–4                                    | 3.99 (2.95–5.41)          | < 0.001 | 4.17 (2.99–5.82)    | < 0.001 |
| Serum LDH > UNL                                 | 3.69 (2.83–4.80)          | < 0.001 | 3.78 (2.80–5.10)    | < 0.001 |
| Ann Arbor stage, III–IV                         | 3.20 (2.44–4.20)          | < 0.001 | 3.49 (2.57–4.76)    | < 0.001 |
| Extranodal sites $\geq$ 2                       | 2.72 (2.15–3.46)          | < 0.001 | 2.93 (2.24–3.82)    | < 0.001 |
| B symptoms                                      | 2.37 (1.85–3.03)          | < 0.001 | 2.39 (1.82–3.15)    | < 0.001 |
| Non-GCB type by the Hans algorithm <sup>a</sup> | 1.40 (1.04–1.88)          | 0.026   | 1.50 (1.07–2.10)    | 0.019   |
| Bone marrow involvement                         | 1.91 (1.44–2.54)          | < 0.001 | 1.82 (1.32–2.51)    | < 0.001 |
| Bulky disease > 10 cm                           | 1.61 (1.10–2.35)          | 0.014   | 1.51 (0.98–2.33)    | 0.061   |
| Estimated GFR < 60                              | 2.26 (1.59–3.23)          | < 0.001 | 2.52 (1.71–3.70)    | < 0.001 |
| <b>IPI</b>                                      |                           |         |                     |         |
| Low (0–1)                                       | 1                         |         | 1                   |         |
| Low-intermediate (2)                            | 1.90 (1.29–2.79)          | 0.001   | 1.81 (1.14–2.87)    | 0.012   |
| High-intermediate (3)                           | 3.13 (2.22–4.42)          | < 0.001 | 3.81 (2.59–5.61)    | < 0.001 |
| High (4–5)                                      | 7.29 (5.35–9.94)          | < 0.001 | 7.88 (5.53–11.22)   | < 0.001 |
| <b>Revised IPI</b>                              |                           |         |                     |         |
| Very good (0)                                   | 1                         |         | 1                   |         |
| Good (1–2)                                      | 3.44 (2.07–5.70)          | < 0.001 | 2.91 (1.65–2.52)    | < 0.001 |
| Poor (3–5)                                      | 9.64 (5.93–15.69)         | < 0.001 | 10.05(5.80–17.41)   | < 0.001 |
| <b>NCCN-IPI</b>                                 |                           |         |                     |         |
| Low (0–1)                                       | 1                         |         | 1                   |         |
| Low-intermediate (2–3)                          | 2.48 (1.43–4.29)          | 0.001   | 2.98 (1.49–5.99)    | 0.002   |
| High-intermediate (4–5)                         | 7.12 (4.16–12.17)         | < 0.001 | 9.10 (4.60–17.99)   | < 0.001 |
| High ( $\geq$ 6)                                | 17.17 (9.60–30.72)        | < 0.001 | 24.47 (11.90–50.32) | < 0.001 |

Abbreviations: *B2M*, beta-2 microglobulin; *CI*, confidence interval; *ECOG*, Eastern Cooperative Oncology Group; *GCB*, germinal center-like B cell-like; *HR*, hazard ratio; *IPI*, International Prognostic index *LDH*, lactate dehydrogenase; *NCCN*, National Comprehensive Cancer Network; *PS*, performance score; *UNL*, upper normal limit to.

<sup>a</sup>Data for the Hans algorithm were available in 693 patients.

### External validation in validation cohort

Between August 2010 and August 2012, 595 patients with DLBCL were enrolled in a prospective multicenter cohort study, the Prospective Cohort Study with Central Nervous System Evaluation in DLBCL (PROCESS) study (ClinicalTrials.gov identifier: NCT01202448) which included 26 institutes participating in the Consortium for Improving Survival of Lymphoma (CISL) in Korea [17]. All patients were treated with at least one cycle of R-CHOP. Eighty-two patients enrolled from our institution were excluded for avoiding data duplication. Baseline serum beta-2 microglobulin levels were

measured in 258 (50.3%) patients from 12 institutions by radioimmunoassay and these 258 patients were included in the external validation cohort in the current study.

The median value of beta-2 microglobulin in the validation cohort consisting of 258 patients with DLBCL was 2.1 (range, 0.5–25.7) mg/L. In 84 patients (32.6%), the baseline beta-2 microglobulin levels were found to be elevated. Patients in the training cohort were slightly younger than those in the validation cohort (median age, 58 vs. 61 years) and had better ECOG PS (PS 0–1, 91.5% vs. 86.8%) and less frequent B-symptoms (22.2% vs. 28.7%). Other baseline characteristics were not significantly different between the training cohort and the validation



**Table 3: Multivariate analysis for the prognostic impact of clinical factors on progression free survival and overall survival**

|                          | Progression-free survival |         | Overall survival |         |
|--------------------------|---------------------------|---------|------------------|---------|
|                          | HR (95% CI)               | P value | HR (95% CI)      | P value |
| B2M ( $\geq 2.5$ mg/L)   | 1.70 (1.29–2.24)          | < 0.001 | 2.00 (1.47–2.75) | < 0.001 |
| Age (> 60 years)         | 1.94 (1.50–2.50)          | < 0.001 | 2.13 (1.60–2.83) | < 0.001 |
| ECOG PS (3–4)            | 1.65 (1.19–2.28)          | 0.003   | 1.70 (1.18–2.39) | 0.003   |
| LDH (> UNL)              | 2.12 (1.57–2.87)          | < 0.001 | 1.96 (1.39–2.77) | < 0.001 |
| Ann Arbor stage $\geq 3$ | 1.42 (1.19–2.20)          | 0.002   | 1.68 (1.18–2.39) | 0.004   |

Abbreviations: *B2M*, beta-2 microglobulin; *CI*, confidence interval; *ECOG*, Eastern Cooperative Oncology Group; *HR*, hazard ratio; *LDH*, lactate dehydrogenase; *PS*, performance score; *UNL*, upper normal limit.

cohort (Supplementary Table S1). With a median follow-up duration of 34.7 months (range, 16.0–52.2), median PFS and OS values could not be reached. The 3-year PFS and OS rates were 71.8% and 69.3%, respectively in the validation cohort (Supplementary Figure S1A and S1B). Univariate analysis showed that patients with elevated beta-2 microglobulin levels had significantly worse PFS (HR, 3.34; 95% CI, 2.15–5.21;  $p < 0.001$ ) and OS (HR, 3.01; 95% CI, 1.99–4.78;  $p < 0.001$ ) (Supplementary Table S2, Supplementary Figure S1C and S1D). Furthermore, multivariate analysis including confounding variables such as older age (> 60 years), poor performance status (ECOG PS 2–4), elevated serum LDH, advanced disease stage (stage III–IV), multiple extranodal involvement ( $\geq 2$ ), presence of B-symptoms, and bone marrow involvement showed that high beta-2 microglobulin retained its significant poor prognostic impact for PFS (HR, 1.93; 95% CI, 1.18–3.18;  $p = 0.009$ ) and exhibited a strong trend toward worse OS with borderline statistical significance (HR, 1.64; 95% CI, 0.98–2.75;  $p = 0.062$ ) (Table 4).

## DISCUSSION

In this retrospective cohort study, the elevated baseline serum beta-2 microglobulin was associated with distinct adverse clinical features and higher IPI, R-IPI and NCCN-IPI risk groups in patients with DLBCL treated with R-CHOP. Moreover, the elevated baseline serum beta-2 microglobulin was found to be a potent independent poor prognostic factor for patients with DLBCL in the rituximab era.

Recent advances in biology, immunology, and genomics identified novel biomarkers of lymphoma such as oncogenic proteins, biologic pathways, and genetic mutations [2, 18–21]. However, high costs, long turnaround time, and methodological complexities remain big hurdles for widespread adoption of biological technologies in real-life clinical practice.

Serum beta-2 microglobulin is a simple, inexpensive, and standardized measurable parameter.

As well-established prognostic factor, high serum beta-2 microglobulin is a component of the International Staging System (ISS) and Revised-ISS for multiple myeloma [12, 13, 22, 23] and one of the parameters of the follicular lymphoma international prognostic index 2, a proven prognostic model of follicular lymphoma in the rituximab era [14]. Previous studies suggested serum beta-2 microglobulin level as a potential prognostic biomarker of diverse lymphoproliferative disorders, including Hodgkin lymphoma [24, 25], mucosa-associated lymphoid tissue lymphoma [26, 27], DLBCL prior to the rituximab era [16, 28], mantle cell lymphoma [29, 30], and nasal NK/T-cell lymphoma [31, 32]. The biological mechanisms underlying the association between elevated serum beta-2 microglobulin and poor prognosis are not completely understood. Finding from previous studies suggested that serum beta-2 microglobulin might indicate cell turnover rate, high tumor burden and subsequent unfavorable clinical course of cancer [11, 33].

The prognostic role of beta-2 microglobulin in patients with DLBCL treated with rituximab has not been fully investigated in previous studies except for the notable Japanese studies by Kanemasa et al. and Miyashita et al. [34, 35]. They reported that elevated serum beta-2 microglobulin was a poor prognostic predictor in patients with DLBCL in the rituximab era. However, there are several limitations that should be considered in the interpretation of these two studies. First, there was a discrepancy in the cutoff values of serum beta-2 microglobulin used between the two studies. Both groups used receiver operating characteristic curve (ROC) analysis for predicting binary outcome (death or alive) and PFS, respectively with 3.2 mg/L and 1.75 mg/L as cutoff values. As time-dependent ROC analysis is considered as more reliable than ROC analysis with binary outcomes in assessing parameters as potential prognostic factors, the present study focused on the cutoff value reported by Miyashita *et al.* However, they reported that this cutoff had < 50% specificity, although the sensitivity was > 80%. Second, neither study considered renal impairment as a

**Table 4: Clinical factors prognostic of progression free survival and overall survival by multivariate selection in the validation cohort**

|                        | Progression free survival |           | Overall survival |           |
|------------------------|---------------------------|-----------|------------------|-----------|
|                        | HR (95% CI)               | P value   | HR (95% CI)      | P value   |
| B2M ( $\geq 2.5$ mg/L) | 1.93 (1.18–3.18)          | 0.009     | 1.64 (0.98–2.75) | 0.062     |
| Age ( $> 60$ years)    | 2.06 (1.28–3.32)          | 0.003     | 2.47 (1.48–4.11) | 0.001     |
| ECOG PS (3–4)          | 3.00 (1.80–5.01)          | $< 0.001$ | 2.90 (1.68–4.99) | $< 0.001$ |
| LDH ( $> UNL$ )        | 1.68 (1.00–2.83)          | 0.049     | 1.88 (1.09–3.24) | 0.023     |

Abbreviations: *B2M*, beta-2 microglobulin; *CI*, confidence interval; *ECOG*, Eastern Cooperative Oncology Group; *HR*, hazard ratio; *LDH*, lactate dehydrogenase; *PS*, performance score; *UNL*, upper normal limit.

potential confounder. Given that beta-2 microglobulin is excreted mainly via kidneys, renal failure itself might lead to increased serum beta-2 microglobulin levels. Finally, neither study included further validation on external cohorts.

The current study aimed to identify a more reliable cutoff value using a statistical technique outlined by Contal *et al.* and found that the cutoff serum beta-2 microglobulin level of  $\geq 2.4$  mg/L was the best predictor of OS [36]. This value was very close to the manufacturer's upper normal limit of  $\geq 2.5$  mg/L; thus, serum beta-2 microglobulin value of  $\geq 2.5$  mg/L was used as the cutoff value for easy adoption of beta-2 microglobulin levels in real-life clinical practice. In current study, the subgroup analysis was performed according to renal function status. In the subgroup with normal renal function, elevated serum beta-2 microglobulin retained a significant prognostic predictor for worse PFS and OS. In the subgroup with impaired renal function, almost all patients had elevated serum beta-2 microglobulin levels and only five patients had normal beta-2 microglobulin levels. In this subgroup, although, a strong trend toward worse PFS and OS rates existed among patients with elevated serum beta-2 microglobulin levels, statistically significance could not be reached due to the small number of patients with normal beta-2 microglobulin levels. Thus, the findings of the current study suggest that elevated serum beta-2 microglobulin might reflect poor prognosis even in patients with DLBCL with impaired renal function. A subset of patients with DLBCL were enrolled in the PROCESS study, used as external validation cohort in current study, confirmed that elevated beta-2 microglobulin level ( $\geq 2.5$  mg/L) was a predictor of worse PFS and OS rates.

To the best of our knowledge, this is the largest study to demonstrate the prognostic significance of serum beta-2 microglobulin in patients with DLBCL treated with rituximab and the first study to validate its prognostic impact in an independent validation cohort. Moreover, serum beta-2 microglobulin level performed well as a prognostic predictor in risk groups (L/LI vs. HI/H) of both IPI and NCCN-IPI, suggesting that beta-2 microglobulin

might be a better prognostic indicator than other elements of the IPI, especially external nodal involvement which had no statistical significance in multivariate analysis in current study.

However, there are several limitations of present study that need to be addressed. First, this was retrospective study, even though prospective cohorts were used (Asan Medical Center registry as the training cohort and PROCESS study as the validation cohort). Second, the sample size of the validation cohort was small due to missing data including beta-2 microglobulin values. Finally, the follow-up duration of validation cohort was relatively shorter than that of the training cohort.

In summary, this study demonstrated that patients with DLBCL with elevated serum beta-2 microglobulin showed distinct adverse clinical features and followed a significantly worse clinical course. Further analysis confirmed the significance of serum beta-2 microglobulin as an independent prognostic factor for patient with DLBCL receiving R-CHOP immunotherapy. Further studies are needed to determine whether a modified prognostic index that incorporate serum beta-2 microglobulin will show improved performance in patients with DLBCL.

## MATERIALS AND METHODS

### Patients

We identified 940 patients diagnosed with DLBCL in Asan Medical Center lymphoma registry between January 2004 and April 2014. A total of 833 patients who met the following criteria were included in this study: (1) pathologically confirmed DLBCL according to the World Health Organization (WHO) classification, (2) administration of R-CHOP as first-line treatment, (3) available serum beta-2 microglobulin measurement at diagnosis. Patients with unknown baseline serum beta-2 microglobulin levels, patients with primary central nervous system lymphoma, and those who were positive for human immunodeficiency virus were excluded from

the study. Clinical data including disease and survival status were updated in June 2015. This study was approved by the institutional review boards at Asan Medical Center, in accordance with the Declaration of Helsinki.

### Clinical characteristics and treatment

Clinical characteristics obtained were age, sex, ECOG PS, LDH, serum creatinine, Ann Arbor stage, extranodal involvement, bone marrow involvement, presence of B-symptoms, and presence of bulky disease ( $> 10$  cm). The IPI, R-IPI, and NCCN-IPI risk groups were estimated using pretreatment variables including age, LDH, ECOG PS, Ann Arbor stage, and extranodal involvement [5, 7, 8].

First-line treatment consisted of standard R-CHOP therapy (375 mg/m<sup>2</sup> rituximab, 750 mg/m<sup>2</sup> cyclophosphamide, 50 mg/m<sup>2</sup> doxorubicin, and 1.4 mg/m<sup>2</sup> [maximum 2.0 mg/body] vincristine on day 1, and 100 mg prednisolone on days 1–5 for 21 days per cycle). Treatment response was assessed using the revised response criteria [37].

### Pathology

The pathology of the patients with DLBCL was confirmed by an expert hematopathologist (J.H.) using the WHO classification. For immunohistochemical staining, a panel of monoclonal antibodies against CD20, CD3, CD10, BCL-6, BCL-2, IRF4/MUM-1, and Ki67 were used. Patients were classified into GCB and non-GCB subtypes using the Hans algorithm [38].

### Determination of serum beta-2 microglobulin

Serum beta-2 microglobulin levels were determined using a radioimmunoassay kit (Immunotech, Prague, Czech Republic), according to the manufacturer's instructions. The optimal cutoff point of serum beta-2 microglobulin level was estimated at 2.4 mg/L using the methods by Contal *et al.*, that maximizes the difference between two groups by a defined cutoff value [36] (Supplementary Table S3). This value was very close to the manufacturer's upper normal limit ( $\geq 2.5$  mg/L), and the prognostic impact of beta-2 microglobulin according to the cutoff values of 2.4 and 2.5 mg/L were comparable by multivariate analysis (Supplementary Table S4). Thus, the serum beta-2 microglobulin level of  $\geq 2.5$  mg/L was used as the cutoff value to dichotomize patients into low beta-2 microglobulin ( $< 2.5$  mg/L) and high beta-2 microglobulin ( $\geq 2.5$  mg/L) groups for further analysis.

### Statistical analysis

Categorical variables were evaluated using the chi-square test or Fisher's exact test, as appropriate. PFS was

defined as the time from diagnosis to tumor recurrence, progression or death from any cause, and OS was calculated from the date of diagnosis to death. PFS and OS were censored on the last date of follow-up. The Kaplan–Meier analysis was used to estimate PFS and OS, and survival curves were compared by the log-rank test. The Cox proportional hazards model was used to estimate HRs for survival outcomes. *P* values of  $< 0.05$  were considered statistically significant, and two-sided tests were used in all analyses. Statistical analyses were performed using the Statistical Package for the Social Sciences version 21 (IBM Co., Armonk, NY).

### ACKNOWLEDGMENTS

We thank Shin Kim, Kyoungmin Lee, Eun Hee Kang and Jung Sun Park for collection and management of data.

### CONFLICTS OF INTEREST

The authors declare that they have no conflicts of interest.

### GRANT SUPPORT

There was no grant support for this study.

### REFERENCES

1. Alizadeh AA, Eisen MB, Davis RE, Ma C, Lossos IS, Rosenwald A, Boldrick JC, Sabet H, Tran T, Yu X, Powell JI, Yang L, Marti GE, et al. Distinct types of diffuse large B-cell lymphoma identified by gene expression profiling. *Nature*. 2000; 403:503–511.
2. Roschewski M, Staudt LM, Wilson WH. Diffuse large B-cell lymphoma-treatment approaches in the molecular era. *Nat Rev Clin Oncol*. 2014; 11:12–23.
3. Coiffier B, Lepage E, Briere J, Herbrecht R, Tilly H, Bouabdallah R, Morel P, Van Den Neste E, Salles G, Gaulard P, Reyes F, Lederlin P, Gisselbrecht C. CHOP chemotherapy plus rituximab compared with CHOP alone in elderly patients with diffuse large-B-cell lymphoma. *N Engl J Med*. 2002; 346:235–242.
4. Pfreundschuh M, Trumper L, Osterborg A, Pettengell R, Trneny M, Imrie K, Ma D, Gill D, Walewski J, Zinzani PL, Stahel R, Kvaloy S, Shpilberg O, et al. CHOP-like chemotherapy plus rituximab versus CHOP-like chemotherapy alone in young patients with good-prognosis diffuse large-B-cell lymphoma: a randomised controlled trial by the MabThera International Trial (MInT) Group. *Lancet Oncol*. 2006; 7:379–391.
5. A predictive model for aggressive non-Hodgkin's lymphoma. The International Non-Hodgkin's Lymphoma Prognostic Factors Project. *N Engl J Med*. 1993; 329:987–994.



6. Ziepert M, Hasenclever D, Kuhnt E, Glass B, Schmitz N, Pfreundschuh M, Loeffler M. Standard International prognostic index remains a valid predictor of outcome for patients with aggressive CD20+ B-cell lymphoma in the rituximab era. *J Clin Oncol.* 2010; 28:2373–2380.
7. Sehn LH, Berry B, Chhanabhai M, Fitzgerald C, Gill K, Hoskins P, Klasa R, Savage KJ, Shenkier T, Sutherland J, Gascoyne RD, Connors JM. The revised International Prognostic Index (R-IPI) is a better predictor of outcome than the standard IPI for patients with diffuse large B-cell lymphoma treated with R-CHOP. *Blood.* 2007; 109:1857–1861.
8. Zhou Z, Sehn LH, Rademaker AW, Gordon LI, Lacasce AS, Crosby-Thompson A, Vanderplas A, Zelenetz AD, Abel GA, Rodriguez MA, Nademanee A, Kaminski MS, Czuczman MS, et al. An enhanced International Prognostic Index (NCCN-IPI) for patients with diffuse large B-cell lymphoma treated in the rituximab era. *Blood.* 2014; 123:837–842.
9. Peterson PA, Cunningham BA, Berggard I, Edelman GM. 2-Microglobulin--a free immunoglobulin domain. *Proc Natl Acad Sci U S A.* 1972; 69:1697–1701.
10. Grey HM, Kubo RT, Colon SM, Poulik MD, Cresswell P, Springer T, Turner M, Strominger JL. The small subunit of HL-A antigens is beta 2-microglobulin. *J Exp Med.* 1973; 138:1608–1612.
11. Shi C, Zhu Y, Su Y, Chung LW, Cheng T. Beta2-microglobulin: emerging as a promising cancer therapeutic target. *Drug Discov Today.* 2009; 14:25–30.
12. Greipp PR, San Miguel J, Durie BG, Crowley JJ, Barlogie B, Blade J, Boccadoro M, Child JA, Avet-Loiseau H, Kyle RA, Lahuerta JJ, Ludwig H, Morgan G, et al. International staging system for multiple myeloma. *J Clin Oncol.* 2005; 23:3412–3420.
13. Palumbo A, Avet-Loiseau H, Oliva S, Lokhorst HM, Goldschmidt H, Rosinol L, Richardson P, Caltagirone S, Lahuerta JJ, Facon T, Bringhen S, Gay F, Attal M, et al. Revised International Staging System for Multiple Myeloma: A Report From International Myeloma Working Group. *J Clin Oncol.* 2015; 33:2863–2869.
14. Federico M, Bellei M, Marcheselli L, Luminari S, Lopez-Guillermo A, Vitolo U, Pro B, Pileri S, Pulsoni A, Soubeyran P, Cortelazzo S, Martinelli G, Martelli M, et al. Follicular lymphoma international prognostic index 2: a new prognostic index for follicular lymphoma developed by the international follicular lymphoma prognostic factor project. *J Clin Oncol.* 2009; 27:4555–4562.
15. Swan F, Jr., Velasquez WS, Tucker S, Redman JR, Rodriguez MA, McLaughlin P, Hagemester FB, Cabanillas F. A new serologic staging system for large-cell lymphomas based on initial beta 2-microglobulin and lactate dehydrogenase levels. *J Clin Oncol.* 1989; 7:1518–1527.
16. Lopez-Guillermo A, Colomo L, Jimenez M, Bosch F, Villamor N, Arenillas L, Muntanola A, Montoto S, Gine E, Colomer D, Bea S, Campo E, Montserrat E. Diffuse large B-cell lymphoma: clinical and biological characterization and outcome according to the nodal or extranodal primary origin. *J Clin Oncol.* 2005; 23:2797–2804.
17. Suh C, Kim WS, Kim JS, Park BB. Review of the clinical research conducted by the Consortium for Improving Survival of Lymphoma of the Korean Society of Hematology Lymphoma Working Party. *Blood Res.* 2013; 48:171–177.
18. Intlekofer AM, Younes A. Precision therapy for lymphoma--current state and future directions. *Nat Rev Clin Oncol.* 2014; 11:585–596.
19. Bachireddy P, Burkhardt UE, Rajasagi M, Wu CJ. Haematological malignancies: at the forefront of immunotherapeutic innovation. *Nat Rev Cancer.* 2015; 15:201–215.
20. Morin RD, Mendez-Lago M, Mungall AJ, Goya R, Mungall KL, Corbett RD, Johnson NA, Severson TM, Chiu R, Field M, Jackman S, Krzywinski M, Scott DW, et al. Frequent mutation of histone-modifying genes in non-Hodgkin lymphoma. *Nature.* 2011; 476:298–303.
21. Dubois S, Viailly PJ, Mareschal S, Bohers E, Bertrand P, Ruminy P, Maingonnat C, Jais JP, Peyrouze P, Figeac M, Molina TJ, Desmots F, Fest T, et al. Next-Generation Sequencing in Diffuse Large B-Cell Lymphoma Highlights Molecular Divergence and Therapeutic Opportunities: a LYSA Study. *Clin Cancer Res.* 2016; 22:2919–2928.
22. Bataille R, Boccadoro M, Klein B, Durie B, Pileri A. C-reactive protein and beta-2 microglobulin produce a simple and powerful myeloma staging system. *Blood.* 1992; 80:733–737.
23. Durie BG, Stock-Novack D, Salmon SE, Finley P, Beckord J, Crowley J, Coltman CA. Prognostic value of pretreatment serum beta 2 microglobulin in myeloma: a Southwest Oncology Group Study. *Blood.* 1990; 75:823–830.
24. Vassilakopoulos TP, Nadali G, Angelopoulou MK, Siakantaris MP, Dimopoulou MN, Kontopidou FN, Karkantaris C, Kokoris SI, Kyrtonis MC, Tsaftaris P, Pizzolo G, Pangalis GA. The prognostic significance of beta(2)-microglobulin in patients with Hodgkin's lymphoma. *Haematologica.* 2002; 87:701–708.
25. Dimopoulos MA, Cabanillas F, Lee JJ, Swan F, Fuller L, Allen PK, Hagemester FB. Prognostic role of serum beta 2-microglobulin in Hodgkin's disease. *J Clin Oncol.* 1993; 11:1108–1111.
26. Thieblemont C, Berger F, Dumontet C, Moullet I, Bouafia F, Felman P, Salles G, Coiffier B. Mucosa-associated lymphoid tissue lymphoma is a disseminated disease in one third of 158 patients analyzed. *Blood.* 2000; 95:802–806.
27. Yoo C, Yoon DH, Yoon S, Kim S, Huh J, Park CJ, Lee SW, Suh C. Prognostic impact of beta(2)-microglobulin in patients with non-gastric mucosa-associated lymphoid tissue lymphoma. *Leuk Lymphoma.* 2015; 56:688–693.
28. Johnson PW, Whelan J, Longhurst S, Stepniewska K, Matthews J, Amess J, Norton A, Rohatiner AZ, Lister TA.

- Beta-2 microglobulin: a prognostic factor in diffuse aggressive non-Hodgkin's lymphomas. *Br J Cancer*. 1993; 67:792–797.
29. Romaguera JE, Fayad L, Rodriguez MA, Broglio KR, Hagemester FB, Pro B, McLaughlin P, Younes A, Samaniego F, Goy A, Sarris AH, Dang NH, Wang M, et al. High rate of durable remissions after treatment of newly diagnosed aggressive mantle-cell lymphoma with rituximab plus hyper-CVAD alternating with rituximab plus high-dose methotrexate and cytarabine. *J Clin Oncol*. 2005; 23:7013–7023.
  30. Yoo C, Yoon DH, Kim S, Huh J, Park CS, Park CJ, Lee SW, Suh C. Serum beta-2 microglobulin as a prognostic biomarker in patients with mantle cell lymphoma. *Hematol Oncol*. 2016; 34:22–27.
  31. Yoo C, Yoon DH, Jo JC, Yoon S, Kim S, Lee BJ, Huh J, Lee SW, Suh C. Prognostic impact of beta-2 microglobulin in patients with extranodal natural killer/T cell lymphoma. *Ann Hematol*. 2014; 93:995–1000.
  32. Li ZM, Zhu YJ, Sun J, Xia Y, Huang JJ, Zou BY, Lin TY, Huang HQ, Jiang WQ. Serum beta2-microglobulin is a predictor of prognosis in patients with upper aerodigestive tract NK/T-cell lymphoma. *Ann Hematol*. 2012; 91:1265–1270.
  33. Cassuto JP, Krebs BP, Viot G, Dujardin P, Masseyeff R. Beta 2 microglobulin, a tumour marker of lymphoproliferative disorder. *Lancet*. 1978; 2:950.
  34. Kanemasa Y, Shimoyama T, Sasaki Y, Tamura M, Sawada T, Omuro Y, Hishima T, Maeda Y. Beta-2 microglobulin as a significant prognostic factor and a new risk model for patients with diffuse large B-cell lymphoma. *Hematol Oncol*. 2016.
  35. Miyashita K, Tomita N, Taguri M, Suzuki T, Ishiyama Y, Ishii Y, Nakajima Y, Numata A, Hattori Y, Yamamoto W, Miyazaki T, Tachibana T, Takasaki H, et al. Beta-2 microglobulin is a strong prognostic factor in patients with DLBCL receiving R-CHOP therapy. *Leuk Res*. 2015.
  36. Contal C, O'Quigley J. An application of changepoint methods in studying the effect of age on survival in breast cancer. *Computl Stat Data An*. 1999; 30:253–270.
  37. Cheson BD, Pfistner B, Juweid ME, Gascoyne RD, Specht L, Horning SJ, Coiffier B, Fisher RI, Hagenbeek A, Zucca E, Rosen ST, Stroobants S, Lister TA, et al. Revised response criteria for malignant lymphoma. *J Clin Oncol*. 2007; 25:579–586.
  38. Hans CP, Weisenburger DD, Greiner TC, Gascoyne RD, Delabie J, Ott G, Muller-Hermelink HK, Campo E, Braziel RM, Jaffe ES, Pan Z, Farinha P, Smith LM, et al. Confirmation of the molecular classification of diffuse large B-cell lymphoma by immunohistochemistry using a tissue microarray. *Blood*. 2004; 103:275–282.
