# Supplementary material for: Prognostic significance of serum beta-2 microglobulin in patients with diffuse large B-cell lymphoma in the rituximab era
Source: PubMed Central journal article supplement (PMC5363560; doi:10.18632/oncotarget.12734), 2016-10-18
Supplement: oncotarget-07-76934-s001.pdf [file oncotarget-07-76934-s001.pdf]

## Prognostic significance of serum beta-2 microglobulin in patients with diffuse large B-cell lymphoma in the rituximab era

### Supplementary Materials

**Supplementary Table S1: Baseline characteristics in the training set and validation set**

|                       | Training set<br><i>n</i> = 833 (% of cohort) | Validation set<br><i>n</i> = 258 (% of cohort) | <i>P</i> value |
|-----------------------|----------------------------------------------|------------------------------------------------|----------------|
| Age, Years            |                                              |                                                | 0.008          |
| ≤ 60                  | 488 (58.6)                                   | 127 (49.2)                                     |                |
| > 60                  | 345 (41.4)                                   | 131 (50.8)                                     |                |
| Sex                   |                                              |                                                | 0.751          |
| Male                  | 475 (57.0)                                   | 150 (58.1)                                     |                |
| Female                | 358 (43.0)                                   | 108 (41.9)                                     |                |
| ECOG PS               |                                              |                                                | 0.027          |
| 0–1                   | 762 (91.5)                                   | 224 (86.8)                                     |                |
| 2–4                   | 91 (8.5)                                     | 34 (13.2)                                      |                |
| Serum LDH             |                                              |                                                | 0.148          |
| Normal                | 440 (52.8)                                   | 123 (47.7)                                     |                |
| Elevated              | 393 (47.2)                                   | 135 (52.3)                                     |                |
| Serum B2M             |                                              |                                                | 0.505          |
| < 2.5 mg/L            | 543 (65.2)                                   | 174 (67.4)                                     |                |
| ≥ 2.5 mg/L            | 290 (34.8)                                   | 84 (32.6)                                      |                |
| Ann Arbor stage       |                                              |                                                | 0.766          |
| I–II                  | 398 (47.8)                                   | 126 (48.8)                                     |                |
| III–IV                | 435 (52.2)                                   | 132 (51.2)                                     |                |
| Extranodal sites      |                                              |                                                | 0.523          |
| 0–1                   | 534 (64.1)                                   | 171 (66.3)                                     |                |
| ≥ 2                   | 299 (35.9)                                   | 87 (33.7)                                      |                |
| Bone marrow           |                                              |                                                | 0.568          |
| No involvement        | 708 (85)                                     | 223 (86.4)                                     |                |
| Involvement           | 125 (15)                                     | 35 (13.6)                                      |                |
| B symptoms            |                                              |                                                | 0.033          |
| No                    | 648 (77.8)                                   | 184 (71.3)                                     |                |
| Yes                   | 185 (22.2)                                   | 74 (28.7)                                      |                |
| IPI                   |                                              |                                                | 0.185          |
| Low (0–1)             | 398 (47.8)                                   | 106 (41.1)                                     |                |
| Low-intermediate (2)  | 142 (17.0)                                   | 57 (22.1)                                      |                |
| High-intermediate (3) | 149 (17.9)                                   | 49 (19.0)                                      |                |
| High (4–5)            | 144 (17.3)                                   | 46 (17.8)                                      |                |
| Revised IPI           |                                              |                                                | 0.013          |
| Very good (0)         | 203 (24.4)                                   | 41 (15.9)                                      |                |
| Good (1–2)            | 337 (40.5)                                   | 122 (47.3)                                     |                |
| Poor (3–5)            | 293 (35.2)                                   | 95 (36.8)                                      |                |

Abbreviations: *B2M*, beta-2 microglobulin; *ECOG*, Eastern Cooperative Oncology Group; *IPI*, International Prognostic index; *LDH*, lactate dehydrogenase; *PS*, performance score; *UNL*, upper normal limit.

**Supplementary Table S2: Univariate analysis of the association between clinical factors and survival outcomes in the validation set**

| Characteristics           | Progression free survival |                | Overall survival   |                |
|---------------------------|---------------------------|----------------|--------------------|----------------|
|                           | HR (95% CI)               | <i>P</i> value | HR (95% CI)        | <i>P</i> value |
| Serum B2M $\geq$ 2.5 mg/L | 3.34 (2.15–5.21)          | < 0.001        | 4.16 (3.16–5.48)   | < 0.001        |
| Age > 60 years            | 2.37 (1.48–3.78)          | < 0.001        | 2.73 (1.66–4.51)   | < 0.001        |
| Female                    | 0.81 (0.51–1.27)          | 0.349          | 0.82 (0.51–1.31)   | 0.403          |
| ECOG PS, 2–4              | 4.35 (2.69–7.05)          | < 0.001        | 4.09 (2.45–6.81)   | < 0.001        |
| Serum LDH > UNL           | 2.51 (1.55–4.05)          | < 0.001        | 2.61 (1.57–4.34)   | < 0.001        |
| Ann Arbor stage, III–IV   | 2.02 (1.27–3.19)          | 0.003          | 2.02 (1.24–3.27)   | 0.005          |
| Extranodal sites $\geq$ 2 | 2.06 (1.55–4.05)          | < 0.001        | 1.93 (1.22–3.06)   | 0.005          |
| B symptoms                | 1.51 (0.96–2.40)          | 0.078          | 1.65 (1.02–2.65)   | 0.040          |
| Bone marrow involvement   | 2.49 (1.48–4.16)          | 0.001          | 2.47 (1.45–4.21)   | 0.001          |
| IPI                       |                           |                |                    |                |
| Low                       | 1                         |                | 1                  |                |
| Low-intermediate          | 1.93 (0.98–3.82)          | 0.059          | 1.63 (0.78–3.38)   | 0.193          |
| High-intermediate         | 3.03 (1.59–5.79)          | 0.001          | 2.74 (1.40–5.37)   | 0.003          |
| High                      | 5.26 (2.86–9.68)          | < 0.001        | 5.43 (2.91–10.14)  | < 0.001        |
| Revised IPI               |                           |                |                    |                |
| Very good                 | 1                         |                | 1                  |                |
| Good                      | 5.79 (1.39–24.20)         | 0.016          | 4.96 (1.18–20.87)  | 0.029          |
| Poor                      | 13.78 (3.34–56.76)        | < 0.001        | 12.48 (3.02–51.50) | < 0.001        |

Abbreviations: *B2M*, beta-2 microglobulin; *ECOG*, Eastern Cooperative Oncology Group; *HR*, hazard ratio; *IPI*, International Prognostic index; *LDH*, lactate dehydrogenase; *PS*, performance score; *UNL*, upper normal limit.

**Supplementary Table S3: Cox proportional hazard regression model results for various cutoff points of serum beta-2 microglobulin level to predict overall survival**

| Beta-2 microglobulin (mg/L) | Hazard ratio | <i>P</i> -value | Omnibus test of model coefficient: Chi-square |
|-----------------------------|--------------|-----------------|-----------------------------------------------|
| 2                           | 4.344        | < 0.001         | 82.475                                        |
| 2.1                         | 4.648        | < 0.001         | 100.532                                       |
| 2.2                         | 4.377        | < 0.001         | 107.109                                       |
| 2.3                         | 4.408        | < 0.001         | 107.109                                       |
| 2.4                         | 4.430        | < 0.001         | 123.355                                       |
| 2.5                         | 4.163        | < 0.001         | 121.990                                       |
| 2.6                         | 3.574        | < 0.001         | 99.426                                        |
| 2.7                         | 3.661        | < 0.001         | 105.315                                       |
| 2.8                         | 3.602        | < 0.001         | 103.021                                       |
| 2.9                         | 3.461        | < 0.001         | 95.816                                        |
| 3                           | 3.414        | < 0.001         | 92.434                                        |
| 3.1                         | 3.394        | < 0.001         | 90.586                                        |
| 3.2                         | 3.438        | < 0.001         | 90.904                                        |
| 3.3                         | 3.489        | < 0.001         | 90.844                                        |
| 3.4                         | 3.588        | < 0.001         | 92.203                                        |
| 3.5                         | 3.614        | < 0.001         | 91.457                                        |
| 3.6                         | 3.537        | < 0.001         | 84.107                                        |
| 3.7                         | 3.647        | < 0.001         | 84.607                                        |
| 3.8                         | 3.724        | < 0.001         | 82.507                                        |
| 3.9                         | 3.918        | < 0.001         | 87.658                                        |
| 4.0                         | 3.942        | < 0.001         | 86.197                                        |

**Supplementary Table S4: Clinical factors prognostic of progression free survival and overall survival from multivariate analysis in the training set with beta-2 microglobulin cutoff point of  $\geq 2.4$  mg/L**

| Characteristics          | Progression free survival |                | Overall survival |                |
|--------------------------|---------------------------|----------------|------------------|----------------|
|                          | HR (95% CI)               | <i>P</i> value | HR (95% CI)      | <i>P</i> value |
| B2M ( $\geq 2.4$ mg/L)   | 1.97 (1.48–2.63)          | < 0.001        | 2.16 (1.55–3.00) | < 0.001        |
| Age (> 60 years)         | 1.88 (1.46–2.43)          | < 0.001        | 2.09 (1.57–2.77) | < 0.001        |
| ECOG PS (3–4)            | 1.64 (1.19–2.26)          | 0.003          | 1.70 (1.20–2.42) | 0.003          |
| LDH (> UNL)              | 2.01 (1.49–2.72)          | < 0.001        | 1.89 (1.34–2.67) | < 0.001        |
| Ann arbor Stage $\geq 3$ | 1.58 (1.16–2.45)          | 0.004          | 1.68 (1.18–2.38) | 0.004          |

Abbreviations: *B2M*, beta-2 microglobulin; *ECOG*, Eastern Cooperative Oncology Group; *LDH*, lactate dehydrogenase; *PS*, performance score; *UNL*, upper normal limit.

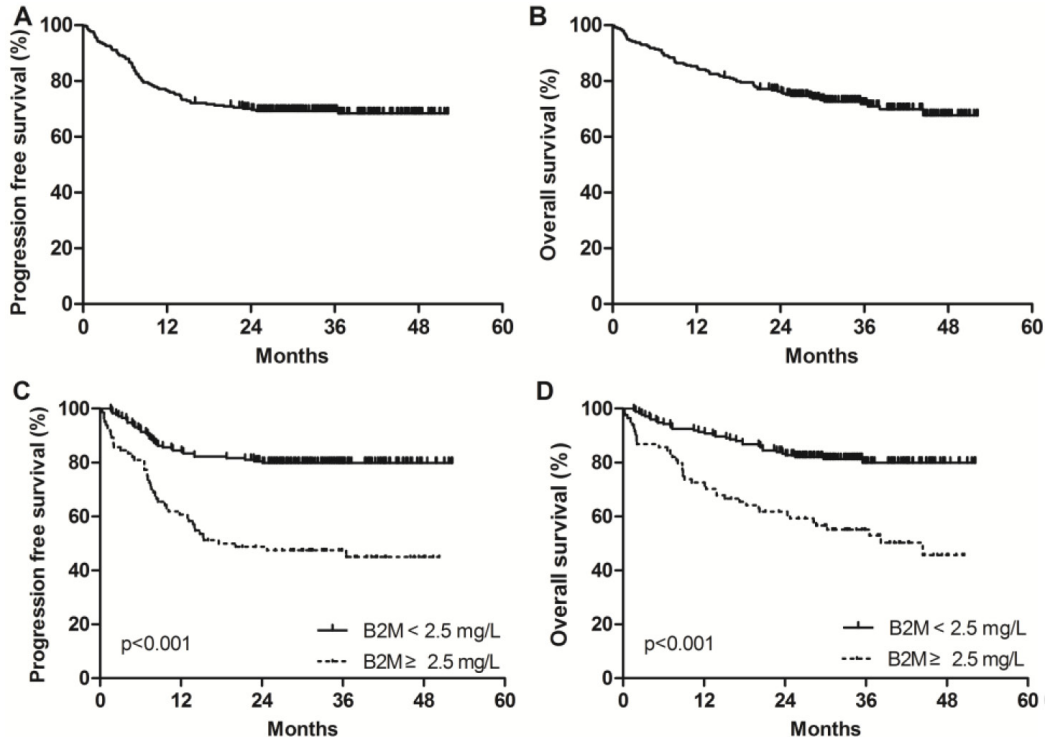

**Supplementary Figure S1: Progression free and overall survival in the validation cohort.** (A) Progression free survival. (B) Overall survival. (C) Progression free survival according to baseline serum beta-2 microglobulin levels. (D) Overall survival according to baseline serum beta-2 microglobulin levels.
